# Supplementary material for: Specific Probiotics for the Treatment of Pediatric Acute Gastroenteritis in India: A Systematic Review and Meta-Analysis
Source: PubMed Central journal article supplement (PMC10191489; doi:10.1097/pg9.0000000000000079), 2021-05-27
Supplement: pg9-2-e079-s004.pdf [file pg9-2-e079-s004.pdf]

| Study            | Risk of bias domains |    |    |    |    |    |    | Overall |
|------------------|----------------------|----|----|----|----|----|----|---------|
|                  | D1                   | D2 | D3 | D4 | D5 | D6 | D7 |         |
| Aggarwal 2014    | +                    | +  | X  | X  | +  | +  | +  | +       |
| Agrawal 2017     | X                    | X  | X  | X  | X  | +  | +  | X       |
| Basu 2007        | +                    | +  | +  | +  | +  | +  | +  | +       |
| Basu 2009        | +                    | +  | +  | +  | +  | +  | +  | +       |
| Bhat 2018        | X                    | X  | X  | X  | +  | +  | +  | X       |
| Burande 2012     | +                    | +  | X  | +  | +  | +  | +  | +       |
| Das 2016         | X                    | +  | +  | +  | +  | +  | +  | +       |
| Dash 2016        | X                    | X  | X  | X  | +  | +  | +  | X       |
| Kumar 2018       | +                    | X  | +  | X  | -  | X  | -  | X       |
| Lahiri 2015A     | X                    | X  | X  | X  | +  | +  | +  | X       |
| Lahiri 2015B     | X                    | X  | X  | X  | +  | +  | +  | X       |
| Misra 2009       | +                    | +  | +  | +  | +  | +  | +  | +       |
| Riaz 2012        | +                    | +  | +  | +  | +  | +  | +  | +       |
| Sindhu 2014      | +                    | X  | +  | +  | +  | +  | +  | +       |
| Sirsat 2017      | +                    | X  | X  | X  | +  | +  | +  | X       |
| Vandepal 2007    | X                    | X  | +  | +  | +  | +  | +  | +       |
| Vidjeadevan 2018 | +                    | X  | +  | X  | +  | X  | +  | +       |

D1: Random method  
 D2: Blind allocation  
 D3: Performance  
 D4: Detection  
 D5: Attrition  
 D6: Reporting  
 D7: Other

Judgement  
 ● High  
 ● Unclear  
 ● Low

SDC Figure 2. Risk of Bias
