# Supplementary material for: Specific Probiotics for the Treatment of Pediatric Acute Gastroenteritis in India: A Systematic Review and Meta-Analysis
Source: PubMed Central journal article supplement (PMC10191489; doi:10.1097/pg9.0000000000000079), 2021-05-27
Supplement: pg9-2-e079-s005.pdf [file pg9-2-e079-s005.pdf]

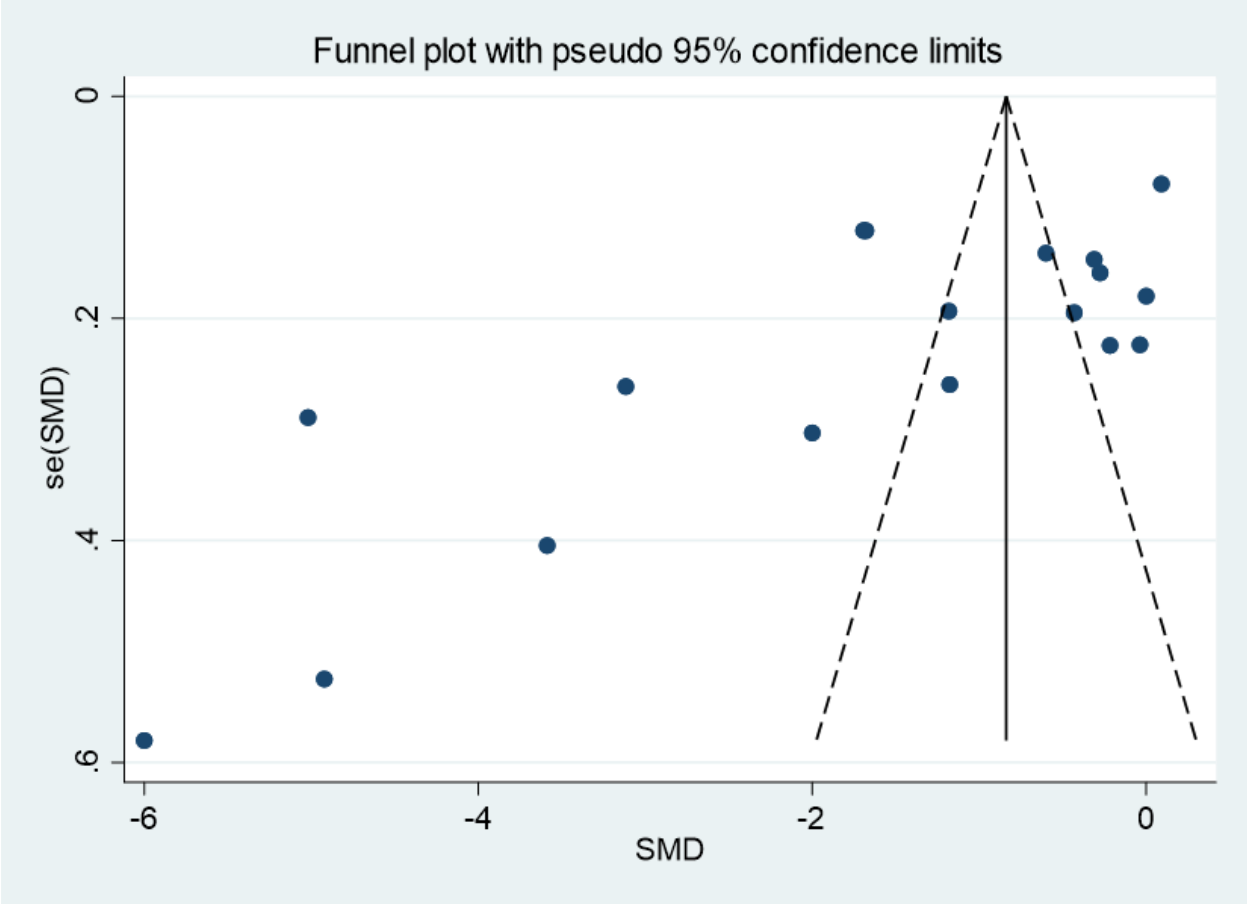

**SDC Figure 3.** Funnel plot for publication bias for trials of duration of diarrhea for pediatric acute gastroenteritis.
