# Supplementary material for: Specific Probiotics for the Treatment of Pediatric Acute Gastroenteritis in India: A Systematic Review and Meta-Analysis
Source: PubMed Central journal article supplement (PMC10191489; doi:10.1097/pg9.0000000000000079), 2021-05-27
Supplement: pg9-2-e079-s007.pdf [file pg9-2-e079-s007.pdf]

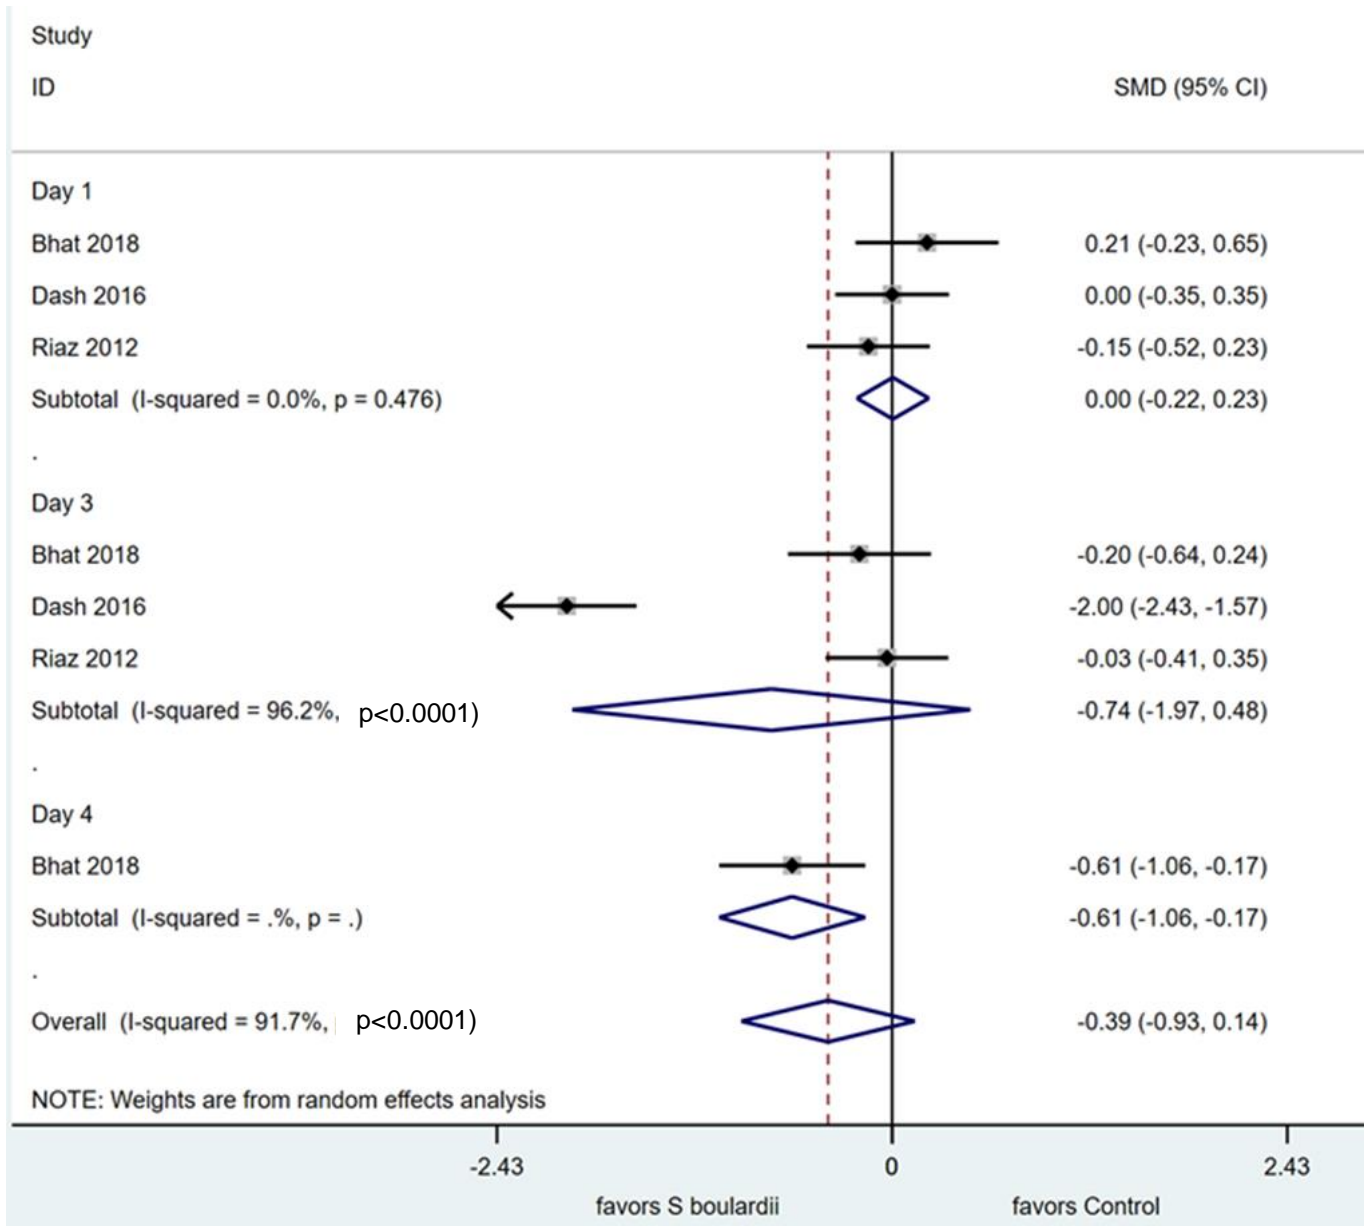

**SDC Figure 5.** Rapidity of Response. Number of Stools/day for *S. bouardii* CNCM I-745.
