# Supplementary material for: Specific Probiotics for the Treatment of Pediatric Acute Gastroenteritis in India: A Systematic Review and Meta-Analysis
Source: PubMed Central journal article supplement (PMC10191489; doi:10.1097/pg9.0000000000000079), 2021-05-27
Supplement: pg9-2-e079-s009.pdf [file pg9-2-e079-s009.pdf]

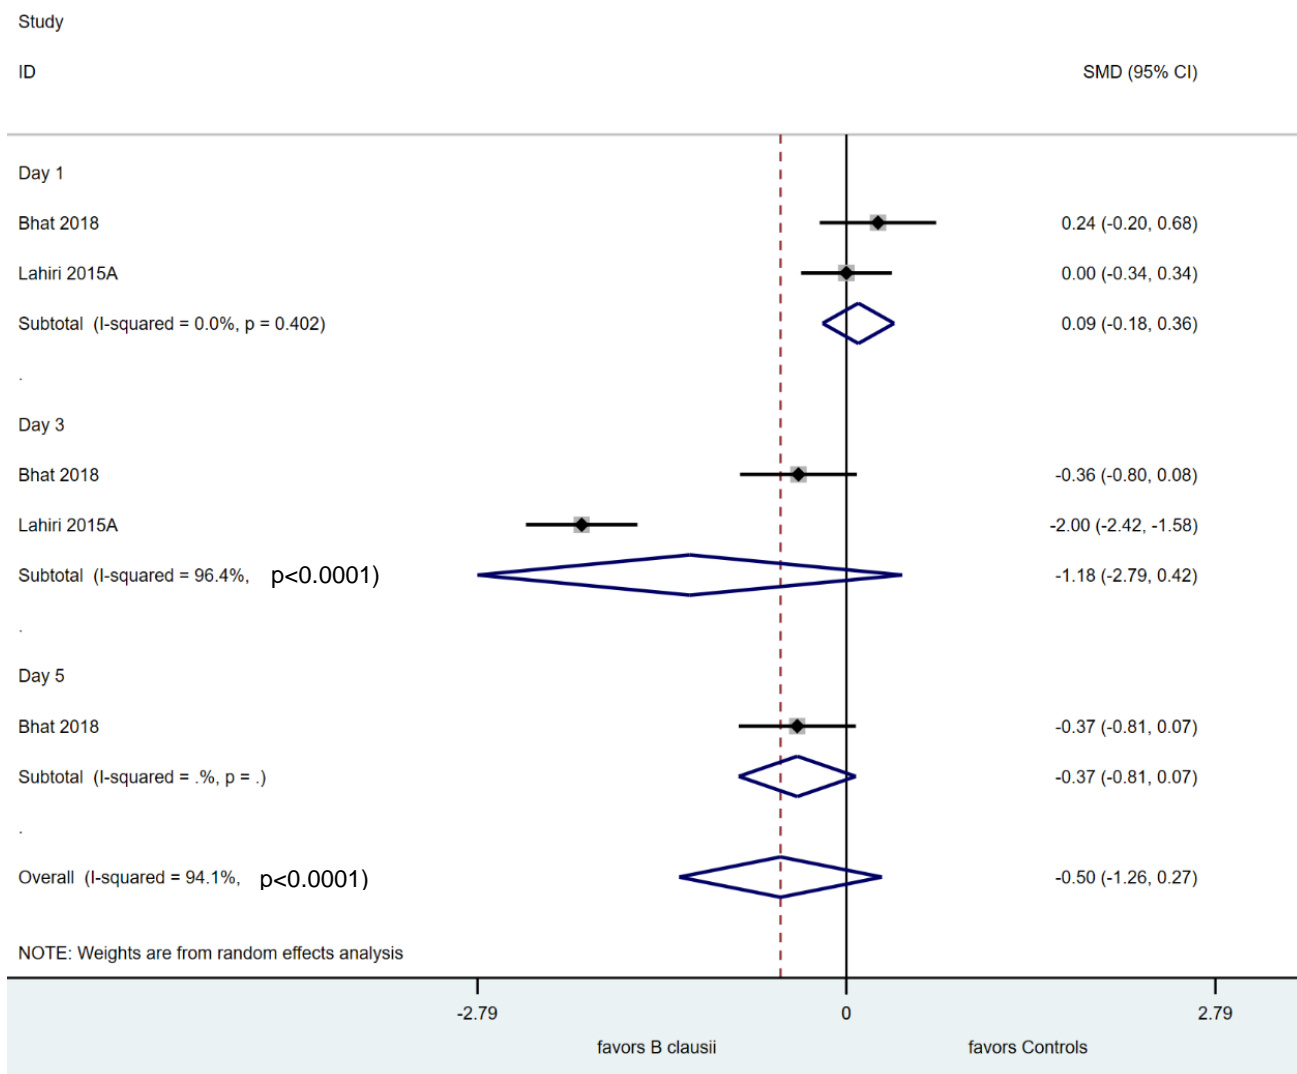

**SDC Figure 7.** Rapidity of Response. Number of Stools/day for *B. clausii* mix for Day 1,3,5.
