# Supplementary material for: Specific Probiotics for the Treatment of Pediatric Acute Gastroenteritis in India: A Systematic Review and Meta-Analysis
Source: PubMed Central journal article supplement (PMC10191489; doi:10.1097/pg9.0000000000000079), 2021-05-27
Supplement: pg9-2-e079-s012.pdf [file pg9-2-e079-s012.pdf]

**SDC Table 2.** Excluded studies with probiotics for the treatment of pediatric acute gastroenteritis done in India (n=12)

| <b>Probiotic</b>                          | <b>Exclusion reason</b>                            | <b>Reference</b>    |
|-------------------------------------------|----------------------------------------------------|---------------------|
| <i>S. boulardii</i> vs. <i>B. clausii</i> | no non-probiotic controls                          | Vineeth S 2017 (31) |
| <i>S. boulardii</i> vs. <i>B. clausii</i> | no non-probiotic controls                          | Reddy 2013 (32)     |
| <i>S. boulardii</i> I-745                 | duplicate of Burande 2012                          | Burande 2013 (33)   |
| <i>S. boulardii</i> I-745                 | no controls, Phase 4 study                         | Kiran 2018 (34)     |
| <i>S. boulardii</i> I-745                 | meeting abstract, not published, insufficient data | Sultana 2017 (35)   |
| <i>Bacillus clausii</i> mix               | duplicate of Lahiri 2015A                          | Ahmad 2018 (36)     |
| <i>Bacillus clausii</i> mix               | website protocol with unsupported data             | Lahiri 2008 (37)    |
| <i>Bacillus clausii</i> mix               | Duplicate of Lahiri 2015                           | Lahiri 2011 (38)    |
| <i>Bacillus clausii</i> mix               | phase 4, no controls                               | Kiran 2017 (39)     |
| <i>L. acidophilus</i> LA                  | dead (not defined probiotic)                       | Khanna 2005 (40)    |
| <i>L. casei</i> DN114001                  | duplicate study of Agarwal 2002                    | Agarwal 2001 (41)   |
| <i>L. rhamnosus</i> GG                    | persistent not acute diarrhea                      | Basu S 2007 (42)    |

**Abbreviations:** B., Bacillus; L., Lactobacillus; S., Saccharomyces
