# Supplementary material for: Specific Probiotics for the Treatment of Pediatric Acute Gastroenteritis in India: A Systematic Review and Meta-Analysis
Source: PubMed Central journal article supplement (PMC10191489; doi:10.1097/pg9.0000000000000079), 2021-05-27
Supplement: pg9-2-e079-s013.pdf [file pg9-2-e079-s013.pdf]

**SDC Table 3.** Study population characteristics for three probiotic types in randomized, controlled trials in India

| Probiotic                             | N randomized | Age Range     | Type of population | Setting (rural/urban) | Attrition (%) | Reference             |
|---------------------------------------|--------------|---------------|--------------------|-----------------------|---------------|-----------------------|
| <i>S. boulardii</i> CNCM I-745        | 80           | 6 mon-5 yr    | inpatient          | urban                 | 0             | Bhat 2018 (43)        |
| <i>S. boulardii</i> CNCM I-745        | 72           | < 5 yrs       | outpatient         | urban                 | 3             | Burande 2012 (44)     |
| <i>S. boulardii</i> CNCM I-745        | 60           | 3 mon-5 yrs   | inpatient          | urban                 | 5             | Das 2016 (45)         |
| <i>S. boulardii</i> CNCM I-745        | 126          | 6 mon-14 yrs  | inpatient          | urban                 | 0             | Dash 2016 (46)        |
| <i>S. boulardii</i> CNCM I-745        | 100          | 6 mon-5 yrs   | inpatient          | nr                    | nr            | Kumar 2018 (47)       |
| <i>S. boulardii</i> CNCM I-745        | 108          | 3 mon-4.9 yrs | inpatient          | urban                 | 8             | Riaz 2012 (48)        |
| <i>S. boulardii</i> CNCM I-745        | 290          | 2 mon-5 yrs   | nr                 | urban                 | 0             | Sirsat 2017 (49)      |
| <i>S. boulardii</i> CNCM I-745        | 202          | 3 mon-3 yrs   | nr                 | nr                    | 7             | Vandeplas 2007 (50)   |
| <i>S. boulardii</i> CNCM I-745        | 67           | 6 mon-3 yrs   | inpatient          | nr                    | 6             | Vidjeadevan 2018 (51) |
| <i>L. rhamnosus</i> GG                | 200          | 6 mon-5 yrs   | mixed (Out, ER)    | nr                    | 12.5          | Aggarwal 2014 (52)    |
| <i>L. rhamnosus</i> GG                | 100          | 6 mon-5 yrs   | outpatient         | nr                    | 35            | Agrawal 2017 (53)     |
| <i>L. rhamnosus</i> GG                | 662          | 6 mon-2 yrs   | inpatient          | nr                    | 2             | Basu 2007 (54)        |
| <i>L. rhamnosus</i> GG-low dose       | 329          | 6 mon-3 yrs   | inpatient          | semi-urban            | 6             | Basu 2009 (55)        |
| <i>L. rhamnosus</i> GG-high dose      | 329          | 6 mon-3 yrs   | inpatient          | semi-urban            | 6             | Basu 2009 (55)        |
| <i>L. rhamnosus</i> GG                | 229          | <3 yrs        | inpatient          | urban                 | 8             | Misra 2009 (56)       |
| <i>L. rhamnosus</i> GG                | 124          | 6 mon-5 yrs   | outpatient         | semi-urban            | 0.8           | Sindhu 2014 (57)      |
| <i>Bacillus clausii</i> O/C,SIN,N/R,T | 80           | 6 mon-5 yrs   | inpatient          | urban                 | 0             | Bhat 2018 (43)        |
| <i>Bacillus clausii</i> O/C,SIN,N/R,T | 131          | 6 mon-12 yrs  | inpatient          | urban                 | 0             | Lahiri 2015 (58)      |
| <i>Bacillus clausii</i> O/C,SIN,N/R,T | 160          | 6 mon-6 yrs   | inpatient          | urban                 | 0             | Lahiri 2015 (59)      |
| <i>Bacillus clausii</i> O/C,SIN,N/R,T | 66           | 6 mon-3 yrs   | inpatient          | nr                    | 6             | Vidjeadevan 2018 (51) |
| Bifilac (4 strains)                   | 80           | 3 mon-3 yrs   | inpatient          | nr                    | 0             | Narayanappa 2008 (60) |
| <i>B. clausii</i> UBBC-07             | 120          | 6 mon-5 yrs   | outpatients        | nr                    | 0.8           | Sudha 2019 (61)       |
| <i>L. casei</i> DN114001              | 100          | 6 mon-5 yrs   | mixed              | mixed                 | 35            | Agarwal 2002 (62)     |
| <i>L. sporogenes</i>                  | 160          | 6 mon-2 yrs   | inpatient          | nr                    | 7.5           | Dutta 2011 (63)       |
| 8 strain mixture                      | 230          | 6 mon-2 yrs   | inpatient          | nr                    | 6             | Dubey 2008 (64)       |

**Notes:** **L. rhamnosus** GG (ATCC 53103); **Bifilac:** 4 strain mixture: *Clostridium butyricum*, *Bacillus mesentericus*, *Streptococcus faecalis*, *Lactobacillus sporogens*, strains not reported, from author correspondence; **8 strain mixture:** *Lactobacillus plantarum* DSM24730, *Streptococcus thermophilus* DSM24731, *Bifidobacterium breve* DSM24732, *L. delbruckii ssp. bulgaricus* DSM24733, *L. paracasei* DSM24734, *Lactobacillus acidophilus* DSM24735, *B. longum* DSM24736, *B. infantis* DSM24737.

**Abbreviations:** ER, emergency room; nr, not reported; mon, months; out, outpatient; yrs, years.
