# Supplementary material for: Specific Probiotics for the Treatment of Pediatric Acute Gastroenteritis in India: A Systematic Review and Meta-Analysis
Source: PubMed Central journal article supplement (PMC10191489; doi:10.1097/pg9.0000000000000079), 2021-05-27
Supplement: pg9-2-e079-s014.pdf [file pg9-2-e079-s014.pdf]

**SDC Table 4.** Probiotic manufacturer and definitions of diarrhea used in trials of acute pediatric diarrhea in India.

| <b>Probiotic</b>                 | <b>Manufacturer</b>     | <b>Brand name</b> | <b>Inclusion diarrhea defined</b> | <b>Resolution of diarrhea defined as</b> | <b>Reference</b>      |
|----------------------------------|-------------------------|-------------------|-----------------------------------|------------------------------------------|-----------------------|
| <i>S. boulardii</i> CNCM I-745   | nr                      | nr                | ≥3 loose/watery stools/day        | last liquid stool                        | Bhat 2018 (43)        |
| <i>S. boulardii</i> CNCM I-745   | Dr. Reddy's Labs, India | Econorm           | ≥3 loose/watery stools/day        | 2 formed stools/d                        | Burande 2012 (44)     |
| <i>S. boulardii</i> CNCM I-745   | Dr. Reddy's Labs, India | Econorm           | ≥3 loose/watery stools/day        | last liquid stool                        | Das 2016 (45)         |
| <i>S. boulardii</i> CNCM I-745   | nr                      | nr                | nr                                | nr                                       | Dash 2016 (46)        |
| <i>S. boulardii</i> CNCM I-745   | Dr. Reddy's Labs, India | Econorm           | ≥3 loose/watery stools/day        | nr                                       | Kumar 2018 (47)       |
| <i>S. boulardii</i> CNCM I-745   | Dr. Reddy's Labs, India | Econorm           | nr                                | 3 formed stools/d                        | Riaz 2012 (48)        |
| <i>S. boulardii</i> CNCM I-745   | nr                      | nr                | nr                                | nr                                       | Sirsat 2017 (49)      |
| <i>S. boulardii</i> CNCM I-745   | nr                      | nr                | nr                                | <3 stools/d                              | Vandeplas 2007 (50)   |
| <i>S. boulardii</i> CNCM I-745   | Dr. Reddy's Labs, India | Econorm           | nr                                | nr                                       | Vidjeadevan 2018 (51) |
| <i>L. rhamnosus</i> GG           | Amerifit Brands USA     | Culturelle        | ≥3 loose/watery stools/day        | last loose stool                         | Aggarwal 2014 (52)    |
| <i>L. rhamnosus</i> GG           | nr                      | nr                | ≥3 loose/watery stools/day        | nr                                       | Agrawal 2017 (53)     |
| <i>L. rhamnosus</i> GG           | nr                      | nr                | ≥3 loose/watery stools/day        | nr                                       | Basu 2007 (54)        |
| <i>L. rhamnosus</i> GG-low dose  | nr                      | nr                | ≥3 loose/watery stools/day        | nr                                       | Basu 2009 (55)        |
| <i>L. rhamnosus</i> GG-high dose | nr                      | nr                | ≥3 loose/watery stools/day        | nr                                       | Basu 2009 (55)        |
| <i>L. rhamnosus</i> GG           | Amerifit Brands USA     | Culturelle        | ≥3 loose/watery stools/day        | <3 stools/d                              | Misra 2009 (56)       |

|                                          |                                       |               |                            |                                    |                       |
|------------------------------------------|---------------------------------------|---------------|----------------------------|------------------------------------|-----------------------|
| <i>L. rhamnosus</i> GG                   | Health Inc. USA                       | Culturelle    | ≥3 loose/watery stools/day | nr                                 | Sindhu 2014 (57)      |
| <i>Bacillus clausii</i><br>O/C,SIN,N/R,T | nr                                    | nr            | ≥3 loose/watery stools/day | last liquid stool                  | Bhat 2018 (43)        |
| <i>Bacillus clausii</i><br>O/C,SIN,N/R,T | Sanofi Aventis,<br>India              | Enterogermnia | nr                         | nr                                 | Lahiri 2015 (58)      |
| <i>Bacillus clausii</i><br>O/C,SIN,N/R,T | Sanofi Aventis,<br>India              | Enterogermnia | nr                         | nr                                 | Lahiri 2015 (59)      |
| <i>Bacillus clausii</i><br>O/C,SIN,N/R,T | nr                                    | Gutspert      | nr                         | nr                                 | Vidjeadevan 2018 (51) |
| Bifilac (4 strains)                      | nr                                    | Bifilac       | nr                         | nr                                 | Narayanappa 2008 (60) |
| <i>B. clausii</i> UBBC-07                | Unique Biotech<br>Ltd., India         | nr            | ≥3 loose/watery stools/day | nr                                 | Sudha 2019 (61)       |
| <i>L. casei</i> DN114001                 | Danone, France                        | Actimel       | nr                         | first semi-solid<br>or solid stool | Agarwal 2002 (62)     |
| <i>L. sporogenes</i>                     | M/S ESKAG<br>Pharm Pri Ltd.,<br>India | nr            | nr                         | first formed<br>stool              | Dutta 2011 (63)       |
| 8 strain mixture                         | CD Pharma, India                      | VSL#3         | nr                         | last liquid stool                  | Dubey 2008 (64)       |

**Notes:** *L. rhamnosus* GG (ATCC 53103); **Bifilac:** 4 strain mixture: *Clostridium butyricum*, *Bacillus mesentericus*, *Streptococcus faecalis*, *Lactobacillus sporogenes*, strains not reported, from author correspondence; **8 strain mixture:** *Lactobacillus plantarum* DSM24730, *Streptococcus thermophilus* DSM24731, *Bifidobacterium breve* DSM24732, *L. delbrueckii ssp. bulgaricus* DSM24733, *L. paracasei* DSM24734, *Lactobacillus acidophilus* DSM24735, *B. longum* DSM24736, *B. infantis* DSM24737.

**Abbreviations:** d, day; nr, not reported
