# Supplementary material for: Specific Probiotics for the Treatment of Pediatric Acute Gastroenteritis in India: A Systematic Review and Meta-Analysis
Source: PubMed Central journal article supplement (PMC10191489; doi:10.1097/pg9.0000000000000079), 2021-05-27
Supplement: pg9-2-e079-s015.pdf [file pg9-2-e079-s015.pdf]

**SDC Table 5.** Sub-group analysis for probiotic efficacy for the reduction of the duration of diarrhea.

| Sub-groups                   | <i>S. boulardii</i> CNCM I-745 |         |                | <i>L. rhamnosus</i> GG |         |                | <i>B. clausii</i> O/C,SIN, N/R, T |         |                |
|------------------------------|--------------------------------|---------|----------------|------------------------|---------|----------------|-----------------------------------|---------|----------------|
|                              | SMD (95% C.I.)                 | P value | I <sup>2</sup> | SMD (95% C.I.)         | P-value | I <sup>2</sup> | SMD (95% C.I.)                    | P-value | I <sup>2</sup> |
| <b>Population:</b>           |                                |         |                |                        |         |                |                                   |         |                |
| inpatient/mixed              | -1.99 (-3.09, -0.90)           | <0.001  | 97.1%          | -0.97 (-1.94, 0.00)    | 0.050   | 98.7%          | -1.39 (-2.74, -0.04)              | <0.001  | 97.3%          |
| outpatient                   | -1.18 (-1.69, -0.67)           | <0.001  | nd             | -2.86 (-6.34, 0.61)    | 0.11    | 99.2%          | na                                | na      | na             |
| <b>Daily probiotic dose:</b> |                                |         |                |                        |         |                |                                   |         |                |
| Low dose                     | na                             | na      | na             | -0.24 (-0.92, 0.43)    | 0.48    | 94.5%          | -2.00 (-2.59, -1.41)              | <0.001  | nd             |
| High dose                    | -1.85 (-2.80, -0.91)           | <0.001  | 96.5%          | -2.36 (-3.57, -1.15)   | <0.001  | 98.4%          | -1.19 (-2.85, 0.47)               | 0.16    | 97.9%          |
| <b>Risk of Bias:</b>         |                                |         |                |                        |         |                |                                   |         |                |
| High risk                    | -0.62 (-1.74, 0.51)            | 0.28    | 93.3%          | -3.59 (-4.38, -2.79)   | <0.001  | nd             | -1.19 (-2.85, 0.47)               | 0.16    | 97.9%          |
| Low risk                     | -2.45 (-3.87, -1.03)           | 0.001   | 97.5%          | -1.46 (-2.48, -0.44)   | 0.005   | 98.9%          | na                                | na      | na             |
| <b>Adequate blinding:</b>    |                                |         |                |                        |         |                |                                   |         |                |
| Open controls                | -1.98 (-3.42, -0.53)           | 0.007   | 96.8%          | -4.33 (-5.73, -2.93)   | <0.001  | 87.9%          | -1.39 (-2.74, -0.04)              | 0.04    | 97.3%          |
| Placebo                      | -1.76 (-3.33, -0.20)           | 0.03    | 97.2%          | -0.78 (-1.61, 0.05)    | 0.07    | 98.4%          | na                                | na      | na             |
| <b>Zinc given:</b>           |                                |         |                |                        |         |                |                                   |         |                |
| Yes                          | -2.05 (-3.36, -0.75)           | 0.002   | 96.4%          | -5.02 (-5.59, -4.45)   | <0.001  | nd             | -1.79 (-3.63, 0.05)               | 0.06    | 97.9%          |
| No                           | -1.65 (-3.39, 0.08)            | 0.062   | 97.4%          | -1.20 (-2.03, -0.37)   | 0.005   | 98.3%          | na                                | na      | na             |

**Notes:** Dose, low dose (<10<sup>10</sup>/day for *S. boulardii* and *L. rhamnosus* GG or 2 x 10<sup>9</sup>/d for *B. clausii* mix); high dose (≥10<sup>10</sup>/day for *S. boulardii* and *L. rhamnosus* GG or 4 x 10<sup>9</sup>/day for *B. clausii* mix).

**Abbreviations:** B., *Bacillus*; C.I., confidence interval; HDI, human development index (0.6, medium; 0.8 high); I<sup>2</sup>, percent heterogeneity L., *Lactobacillus*; na, not applicable as no trials in category or missing data; nd, not determined as only one trial in category; S., *Saccharomyces*
