# Supplementary material for: Specific Probiotics for the Treatment of Pediatric Acute Gastroenteritis in India: A Systematic Review and Meta-Analysis
Source: PubMed Central journal article supplement (PMC10191489; doi:10.1097/pg9.0000000000000079), 2021-05-27
Supplement: pg9-2-e079-s016.pdf [file pg9-2-e079-s016.pdf]

**SDC Table 6.** Duration of diarrhea outcomes for rotavirus positive children in trials done in India by different probiotics.

| Probiotic                             | Probiotic |                                                                | Controls |                                                                | Reference             |
|---------------------------------------|-----------|----------------------------------------------------------------|----------|----------------------------------------------------------------|-----------------------|
|                                       | No.       | Rotavirus +<br>Duration diarrhea<br>(mean $\pm$ std dev hours) | No.      | Rotavirus +<br>Duration diarrhea<br>(mean $\pm$ std dev hours) |                       |
| <i>S. boulardii</i> CNCM I-745        |           | nr                                                             |          | nr                                                             | Bhat 2018 (43)        |
| <i>S. boulardii</i> CNCM I-745        |           | nr                                                             |          |                                                                | Burande 2012 (44)     |
| <i>S. boulardii</i> CNCM I-745        | 30        | 60 $\pm$ 4                                                     | 30       | 89 $\pm$ 7                                                     | Das 2016 (45)         |
| <i>S. boulardii</i> CNCM I-745        |           | nr                                                             |          | nr                                                             | Dash 2016 (46)        |
| <i>S. boulardii</i> CNCM I-745        |           | nr                                                             |          | nr                                                             | Kumar 2018 (47)       |
| <i>S. boulardii</i> CNCM I-745        |           | nr                                                             |          | nr                                                             | Riaz 2012 (48)        |
| <i>S. boulardii</i> CNCM I-745        | 88        | 60/88 (64%)*                                                   | 77       | 30/77 (39%)                                                    | Sirsat 2017 (49)      |
| <i>S. boulardii</i> CNCM I-745        |           | nr                                                             |          | nr                                                             | Vandeplas 2007 (50)   |
| <i>S. boulardii</i> CNCM I-745        |           | nr                                                             |          | nr                                                             | Vidjeadevan 2018 (51) |
| <i>L. rhamnosus</i> GG                | 21        | 60 $\pm$ 3                                                     | 20       | 84 $\pm$ 4.5                                                   | Aggarwal 2014 (52)    |
| <i>L. rhamnosus</i> GG                | nr        | 60 $\pm$ 3                                                     | nr       | 84 $\pm$ 4.5                                                   | Agrawal 2017 (53)     |
| <i>L. rhamnosus</i> GG                |           | nr                                                             |          | nr                                                             | Basu 2007 (54)        |
| <i>L. rhamnosus</i> GG-low dose       |           | nr                                                             |          | nr                                                             | Basu 2009 (55)        |
| <i>L. rhamnosus</i> GG-high dose      |           | nr                                                             |          | nr                                                             | Basu 2009 (55)        |
| <i>L. rhamnosus</i> GG                |           | nr                                                             |          | nr                                                             | Misra 2009 (56)       |
| <i>L. rhamnosus</i> GG                | 45        | 4 $\pm$ 0.5                                                    | 37       | 4 $\pm$ 0.7                                                    | Sindhu 2014 (57)      |
| <i>Bacillus clausii</i> O/C,SIN,N/R,T |           | nr                                                             |          | nr                                                             | Bhat 2018 (43)        |
| <i>Bacillus clausii</i> O/C,SIN,N/R,T |           | nr                                                             |          | nr                                                             | Lahiri 2015 (58)      |
| <i>Bacillus clausii</i> O/C,SIN,N/R,T |           | nr                                                             |          | nr                                                             | Lahiri 2015 (59)      |
| <i>Bacillus clausii</i> O/C,SIN,N/R,T |           | nr                                                             |          | nr                                                             | Vidjeadevan 2018 (51) |
| Bifilac (4 strains)                   | 40        | 104.4 $\pm$ 28.8                                               | 40       | 130.8 $\pm$ 40.6                                               | Narayanappa 2008 (60) |
| <i>B. clausii</i> UBBC-07             |           | nr                                                             |          | nr                                                             | Sudha 2019 (61)       |
| <i>L. casei</i> DN114001              |           | nr                                                             |          | nr                                                             | Agarwal 2002 (62)     |
| <i>L. sporogenes</i>                  | 25        | 28.7 $\pm$ 18.8                                                | 26       | 32.5 $\pm$ 17.8                                                | Dutta 2011 (63)       |
| 8 strain mixture                      |           | nr                                                             |          | nr                                                             | Dubey 2008 (64)       |

**Notes:** **L. rhamnosus** GG (ATCC 53103); **Bifilac:** 4 strain mixture: *Clostridium butyricum*, *Bacillus mesentericus*, *Streptococcus faecalis*, *Lactobacillus sporogens*, strains not reported, from author correspondence; **8 strain mixture:** *Lactobacillus plantarum* DSM24730, *Streptococcus thermophilus* DSM24731, *Bifidobacterium breve* DSM24732, *L. delbruckii ssp. bulgaricus* DSM24733, *L. paracasei* DSM24734, *Lactobacillus acidophilus* DSM24735, *B. longum* DSM24736, *B. infantis* DSM24737.

**Abbreviations:** B., *Bacillus*; L., *Lactobacillus*; nr, not reported; S., *Saccharomyces*; std dev, standard deviation
