# Supplementary material for: Specific Probiotics for the Treatment of Pediatric Acute Gastroenteritis in India: A Systematic Review and Meta-Analysis
Source: PubMed Central journal article supplement (PMC10191489; doi:10.1097/pg9.0000000000000079), 2021-05-27
Supplement: pg9-2-e079-s017.pdf [file pg9-2-e079-s017.pdf]

**SDC Table 7.** Number of daily stools/day for Baseline, Day 3 and Day 5 of treatment for different probiotics.

| Daily frequency of stools/day (mean and standard deviation) |       |            |     |            |             |             |           |            |                       |
|-------------------------------------------------------------|-------|------------|-----|------------|-------------|-------------|-----------|------------|-----------------------|
|                                                             | Day 1 |            |     |            | Day 3       |             | Day 4-5   |            |                       |
| Probiotic                                                   | No.   | Probiotic  | No. | Controls   | Probiotic   | Controls    | Probiotic | Controls   | Reference             |
| <i>S. boulardii</i> CNCM I-745                              | 40    | 6.9 ± 2.8  | 40  | 6.3 ± 2.8  | 2.6 ± 1.3   | 3 ± 2.5     | 0.3 ± 0.8 | 1.3 ± 2.1  | Bhat 2018 (43)        |
| <i>S. boulardii</i> CNCM I-745                              | na    | nr         | na  | nr         | nr          | nr          | nr        | nr         | Burande 2012 (44)     |
| <i>S. boulardii</i> CNCM I-745                              | na    | nr         | na  | nr         | nr          | nr          | nr        | nr         | Das 2016 (45)         |
| <i>S. boulardii</i> CNCM I-745                              | 64    | 8 ± nr     | 62  | 8 ± nr     | 1 ± nr      | 2 ± nr      | nr        | nr         | Dash 2016 (46)        |
| <i>S. boulardii</i> CNCM I-745                              | na    | nr         | na  | nr         | nr          | nr          | nr        | nr         | Kumar 2018 (47)       |
| <i>S. boulardii</i> CNCM I-745                              | 54    | 27 ± 19.2  | 54  | 30 ± 22.2  | 15.3 ± 11.7 | 15.0 ± 13.4 | nr        | nr         | Riaz 2012 (48)        |
| <i>S. boulardii</i> CNCM I-745                              | na    | nr         | na  | nr         | nr          | nr          | nr        | nr         | Sirsat 2017 (49)      |
| <i>S. boulardii</i> CNCM I-745                              | na    | nr         | na  | nr         | nr          | nr          | nr        | nr         | Vandeplass 2007 (50)  |
| <i>S. boulardii</i> CNCM I-745                              | na    | nr         | na  | nr         | nr          | nr          | nr        | nr         | Vidjeadevan 2018 (51) |
| <i>L. rhamnosus</i> GG                                      | na    | nr         | na  | nr         | nr          | nr          | nr        | nr         | Aggarwal 2014 (52)    |
| <i>L. rhamnosus</i> GG                                      | na    | nr         | na  | nr         | nr          | nr          | nr        | nr         | Agrawal 2017 (53)     |
| <i>L. rhamnosus</i> GG                                      | 323   | 22.4 ± 5.3 | 323 | 24.1 ± 5.8 | 18.4 ± 3.2  | 17.3 ± 3.0  | 6.4 ± 2.6 | 6.8 ± 2.1  | Basu 2007 (54)        |
| <i>L. rhamnosus</i> GG-low dose                             | 188   | 24.8 ± 5.4 | 185 | 25.1 ± 4.7 | 21.7 ± 5.7  | 21.7 ± 5.4  | 3.2 ± 2.6 | 10.3 ± 6.3 | Basu 2009 (55)        |
| <i>L. rhamnosus</i> GG-high dose                            | 186   | 25.5 ± 5.6 | 185 | 25.1 ± 4.7 | 22.1 ± 6.0  | 21.7 ± 5.4  | 3.3 ± 2.6 | 10.3 ± 6.3 | Basu 2009 (55)        |
| <i>L. rhamnosus</i> GG                                      | 105   | nr         | 105 | nr         | 2.03 ± nr   | 2.1 ± nr    | 2.6 ± nr  | 2.6 ± nr   | Misra 2009 (56)       |
| <i>L. rhamnosus</i> GG                                      | na    | nr         | na  | nr         | nr          | nr          | nr        | nr         | Sindhu 2014 (57)      |
| <i>Bacillus clausii</i> O/C,SIN,N/R,T                       | 40    | 6.9 ± 2.2  | 40  | 6.3 ± 2.8  | 2.3 ± 1.1   | 3 ± 2.5     | 0.1 ± 0.3 | 0.3 ± 0.7  | Bhat 2018 (43)        |
| <i>Bacillus clausii</i> O/C,SIN,N/R,T                       | 69    | 4 ± nr     | 62  | 4 ± nr     | 1 ± nr      | 2 ± nr      | nr        | nr         | Lahiri 2015 (58)      |
| <i>Bacillus clausii</i> O/C,SIN,N/R,T                       | na    | nr         | na  | nr         | nr          | nr          | nr        | nr         | Lahiri 2015 (59)      |
| <i>Bacillus clausii</i> O/C,SIN,N/R,T                       | na    | nr         | na  | nr         | nr          | nr          | nr        | nr         | Vidjeadevan 2018 (51) |
| Bifilac (4 strains)                                         | na    | nr         | na  | nr         | nr          | nr          | nr        | nr         | Narayanappa 2008 (60) |
| <i>B. clausii</i> UBBC-07                                   | 59    | 8.7 ± 3.4  | 60  | 8.5 ± 3.2  | 5.5 ± 1.0   | 5.9 ± 1.1   | 3.6 ± 0.1 | 3.6 ± 0.1  | Sudha 2019 (61)       |
| <i>L. casei</i> DN114001                                    | na    | nr         | na  | nr         | nr          | nr          | nr        | nr         | Agarwal 2002 (62)     |
| <i>L. sporogenes</i>                                        | na    | nr         | na  | nr         | nr          | nr          | nr        | nr         | Dutta 2011 (63)       |
| 8 strain mixture                                            | 113   | 13 ± nr    | 111 | 14 ± nr    | 5.1 ± nr    | 7.0 ± nr    | nr        | nr         | Dubey 2008 (64)       |

**Notes:** **L. rhamnosus** GG (ATCC 53103); **Bifilac:** 4 strain mixture: *Clostridium butyricum*, *Bacillus mesentericus*, *Streptococcus faecalis*, *Lactobacillus sporogens*, strains not reported, from author correspondence;. **8 strain mixture:** *Lactobacillus plantarum* DSM24730, *Streptococcus thermophilus* DSM24731, *Bifidobacterium breve* DSM24732, *L. delbruckii ssp. bulgaricus* DSM24733, *L. paracasei* DSM24734, *Lactobacillus acidophilus* DSM24735, *B. longum* DSM24736, *B. infantis* DSM24737.

**Abbreviations:** na, not applicable as outcome not reported in paper; nr, not reported; mon, months; yrs, years
