# Supplementary material for: Specific Probiotics for the Treatment of Pediatric Acute Gastroenteritis in India: A Systematic Review and Meta-Analysis
Source: PubMed Central journal article supplement (PMC10191489; doi:10.1097/pg9.0000000000000079), 2021-05-27
Supplement: pg9-2-e079-s018.pdf [file pg9-2-e079-s018.pdf]

**SDC Table 8.** Length-of-hospital stay outcomes for inpatient pediatric patients in trials done in India for different probiotics

| Probiotic                             | Probiotic |                                          | Controls |                                          | Reference             |
|---------------------------------------|-----------|------------------------------------------|----------|------------------------------------------|-----------------------|
|                                       | No.       | Length of stay (mean $\pm$ std dev days) | No.      | Length of stay (mean $\pm$ std dev days) |                       |
| <i>S. boulardii</i> CNCM I-745        | 40        | 2.7 $\pm$ 0.4                            | 40       | 3.4 $\pm$ 1.1                            | Bhat 2018 (43)        |
| <i>S. boulardii</i> CNCM I-745        |           | nr                                       |          | nr                                       | Burande 2012 (44)     |
| <i>S. boulardii</i> CNCM I-745        | 30        | 3.1 $\pm$ 0.3                            | 30       | 3.8 $\pm$ 0.3                            | Das 2016 (45)         |
| <i>S. boulardii</i> CNCM I-745        | 64        | 2.7 $\pm$ nr                             | 62       | 4.8 $\pm$ nr                             | Dash 2016 (46)        |
| <i>S. boulardii</i> CNCM I-745        |           | nr                                       |          | nr                                       | Kumar 2018 (47)       |
| <i>S. boulardii</i> CNCM I-745        |           | nr                                       |          | nr                                       | Riaz 2012 (48)        |
| <i>S. boulardii</i> CNCM I-745        |           | nr                                       |          | nr                                       | Sirsat 2017 (49)      |
| <i>S. boulardii</i> CNCM I-745        |           | nr                                       |          | nr                                       | Vandeplas 2007 (50)   |
| <i>S. boulardii</i> CNCM I-745        | 34        | 3.4 $\pm$ 1.0                            | 33       | 3.3 $\pm$ 1.1                            | Vidjeadevan 2018 (51) |
| <i>L. rhamnosus</i> GG                | 100       | 3.3 $\pm$ 0.6                            | 100      | 3.8 $\pm$ 0.6                            | Aggarwal 2014 (52)    |
| <i>L. rhamnosus</i> GG                | 32        | 3.3 $\pm$ 0.5                            | 33       | 3.7 $\pm$ 0.6                            | Agrawal 2017 (53)     |
| <i>L. rhamnosus</i> GG                | 323       | 9.3 $\pm$ 1.3                            | 323      | 9.2 $\pm$ 1.3                            | Basu 2007 (54)        |
| <i>L. rhamnosus</i> GG-low dose       | 188       | 6.2 $\pm$ 1.2                            | 185      | 9.7 $\pm$ 2.1                            | Basu 2009 (55)        |
| <i>L. rhamnosus</i> GG-high dose      | 186       | 6.2 $\pm$ 1.1                            | 185      | 9.7 $\pm$ 2.1                            | Basu 2009 (55)        |
| <i>L. rhamnosus</i> GG                |           | nr                                       |          | nr                                       | Misra 2009 (56)       |
| <i>L. rhamnosus</i> GG                |           | nr                                       |          | nr                                       | Sindhu 2014 (57)      |
| <i>Bacillus clausii</i> O/C,SIN,N/R,T | 40        | 3.2 $\pm$ 0.7                            | 40       | 3.4 $\pm$ 1.1                            | Bhat 2018 (43)        |
| <i>Bacillus clausii</i> O/C,SIN,N/R,T | 69        | 2.8 $\pm$ nr                             | 62       | 4.3 $\pm$ nr                             | Lahiri 2015 (58)      |
| <i>Bacillus clausii</i> O/C,SIN,N/R,T |           | nr                                       |          | nr                                       | Lahiri 2015 (59)      |
| <i>Bacillus clausii</i> O/C,SIN,N/R,T | 33        | 3.1 $\pm$ 0.9                            | 33       | 3.3 $\pm$ 1.1                            | Vidjeadevan 2018 (51) |
| Bifilac (4 strains)                   |           | nr                                       |          | nr                                       | Narayanappa 2008 (60) |
| <i>B. clausii</i> UBBC-07             |           | nr                                       |          | nr                                       | Sudha 2019 (61)       |
| <i>L. casei</i> DN114001              |           | nr                                       |          | nr                                       | Agarwal 2002 (62)     |
| <i>L. sporogenes</i>                  |           | nr                                       |          | nr                                       | Dutta 2011 (63)       |
| 8 strain mixture                      |           | nr                                       |          | nr                                       | Dubey 2008 (64)       |

**Notes:** **L. rhamnosus** GG (ATCC 53103); **Bifilac:** 4 strain mixture: *Clostridium butyricum*, *Bacillus mesentericus*, *Streptococcus faecalis*, *Lactobacillus sporogens*, strains not reported, from author correspondence; **8 strain mixture:** *Lactobacillus plantarum* DSM24730, *Streptococcus thermophilus* DSM24731, *Bifidobacterium breve* DSM24732, *L. delbrückii ssp. bulgaricus* DSM24733, *L. paracasei* DSM24734, *Lactobacillus acidophilus* DSM24735, *B. longum* DSM24736, *B. infantis* DSM24737.

**Abbreviations:** nr, not reported in paper; std dev, standard deviation
